# Supplementary material
Source: HighWire-hosted journal article supplement (http://jpet.aspetjournals.org/highwire/filestream/146553/field_highwire_adjunct_files/0/258897SupplFigures.pdf)
Supplement: 258897SupplFigures.pdf [file 258897SupplFigures.pdf]

## Complex Effects of Putative DRP-1 Inhibitors on Stress Responses in Mouse Heart and Rat Cardiomyoblasts

*The Journal of Pharmacology and Experimental Therapeutics*

### Supplemental Figures

**Fig. 1**

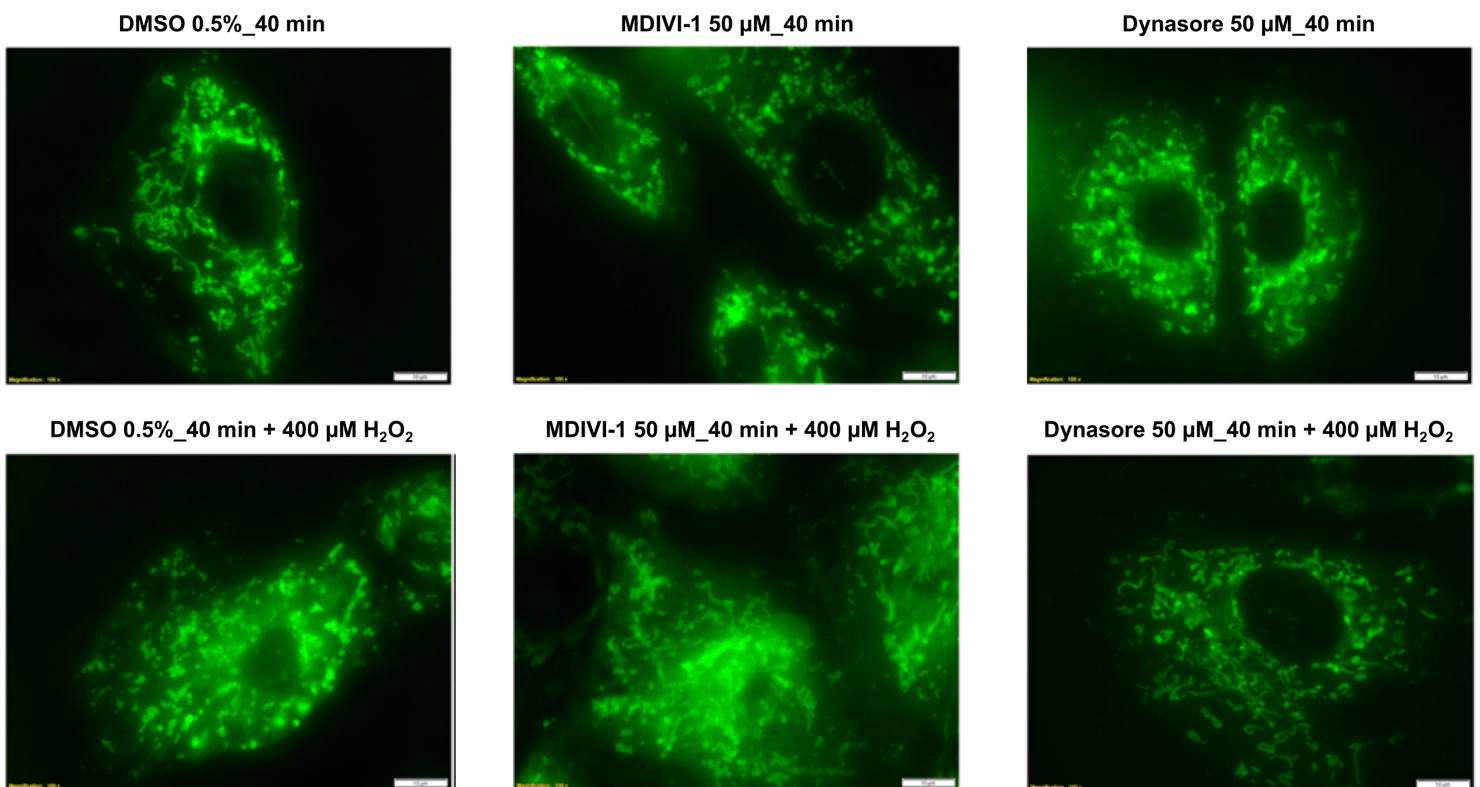

**Mitochondrial morphology in H9c2 cardiomyoblasts exposed to H<sub>2</sub>O<sub>2</sub> ± DRP-1 inhibitors.** H9c2 cells were stained with 100 nM MitoTracker green (Thermo Fisher Scientific, Waltham, Massachusetts) in HBSS for 20 min at 37°C. After staining, HBSS was replaced for full media with 50 μM MDIVI/Dynasore or DMSO (0.5% final concentration) and incubated for 40 min. H<sub>2</sub>O<sub>2</sub> was added to corresponding wells at 400 μM final concentration prior to imaging using fluorescence microscopy (CellM; Olympus, Japan). Note mitochondrial fragmentation (punctate staining) in H<sub>2</sub>O<sub>2</sub> exposed cells, an effect limited by DRP-1 inhibitors.

Fig. 2

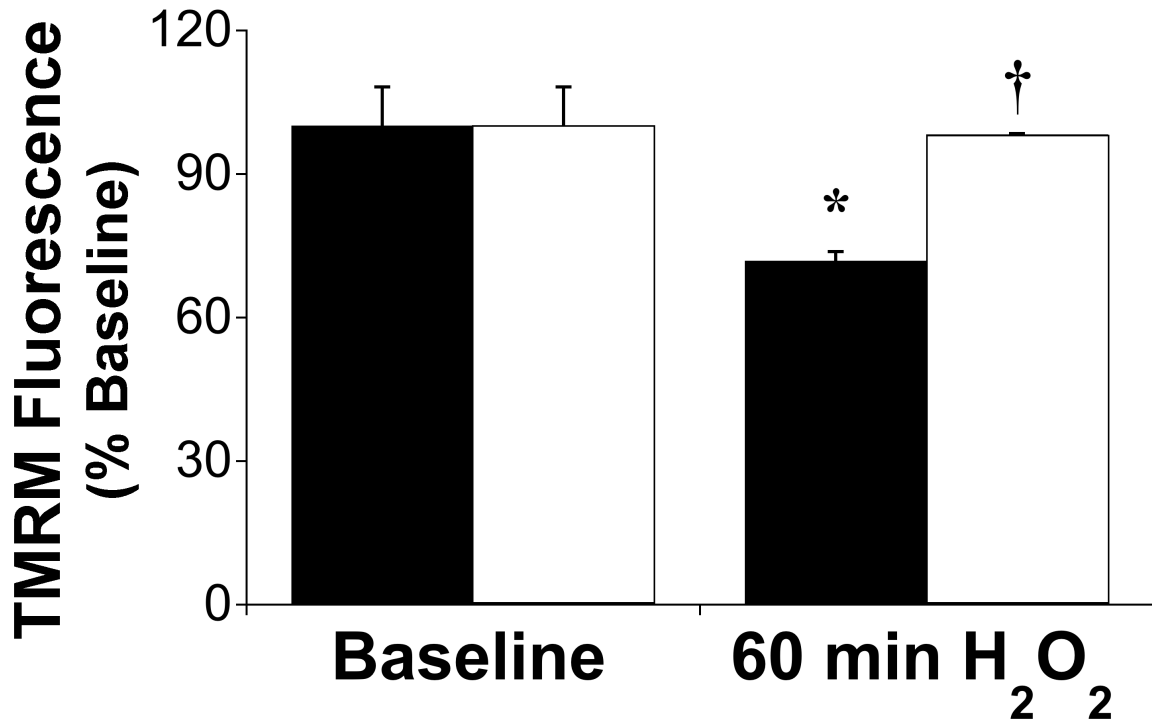

**Preliminary analysis of mitochondrial membrane potential in H9c2 cardiomyoblasts exposed to H<sub>2</sub>O<sub>2</sub> ± MDIVI-1.** For assessment of mitochondrial membrane potential ( $\Delta\psi_m$ ) the fluorescent probe tetramethylrhodamine methyl ester perchlorate (TMRM) was employed, accumulating within mitochondria in proportion to  $\Delta\psi_m$ . After experimentation cells were incubated with 100  $\mu$ M TMRM for 20 min at 37°C (protected from light), harvested and re-suspended in PBS for analysis in a FACS-Calibur flow cytometer ((BD Bioscience, San Jose, CA, USA), with excitation at 549 nm and emission at 575 nm. Data were analyzed using FlowJo software, with median fluorescent intensity values calculated. Results suggest a ~20% fall in membrane potential with H<sub>2</sub>O<sub>2</sub>, an effect reversed by MDIVI-1, however it must be noted data were acquired with a potentially high quenching concentration (100  $\mu$ M) of TMRM.

**Fig. 3.**

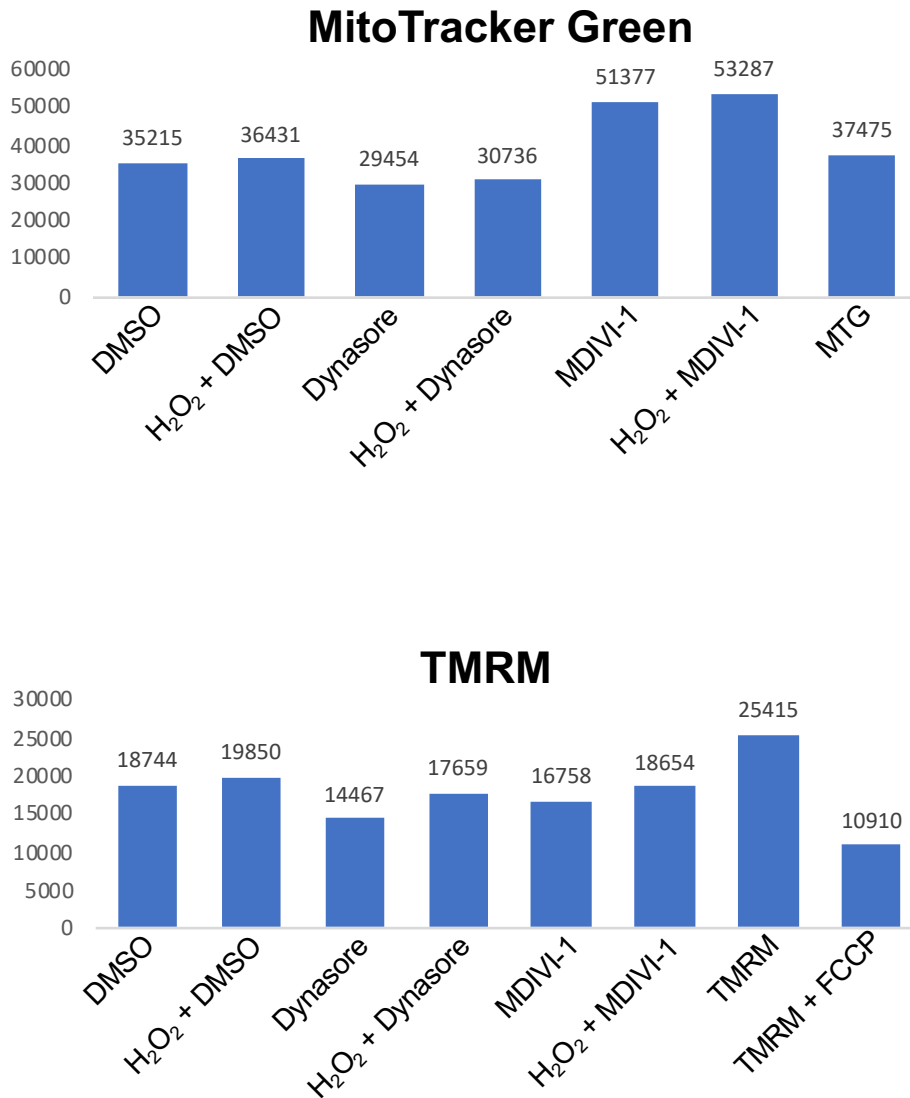

**Supplementary flow cytometry data for MitoTracker green (MTG) and TMRM in H9c2 cardiomyoblasts exposed to H<sub>2</sub>O<sub>2</sub> ± DRP-1 inhibitors.** H9c2 cells were stained with 100 nM MitoTracker green (Thermo Fisher Scientific, Waltham, Massachusetts) in HBSS for 20 min at 37°C. After staining HBSS was replaced for full media with 50 µM MDIVI/Dynasore or DMSO (0.5% final concentration) and incubated for 40 min. After treatment cells were harvested and stained with 20 nM TMRM at 37°C (protected from light) in HBSS+2% FBS. H<sub>2</sub>O<sub>2</sub> was added to corresponding tubes at 400 µM final concentration prior to analysis on a BD LSRII Fortessa flow cytometer (BD Bioscience, San Jose, CA, USA) with excitation at 561 nm, 88/12 BP. Data were analyzed using FlowJo software, with median fluorescent intensity values calculated. Note an apparent drop of mitochondrial potential with MDIVI/Dynasore treatment and increase in MitoTracker green MFI with MDIVI treatment.
